# Supplementary material
Source: ML conference proceedings conference paper supplement (https://openaccess.thecvf.com/content/ICCV2025/html/Zhang_Top2Pano_Learning_to_ICCV_2025_paper.html)
Supplement: Supplementary file 1 [file Zhang_Top2Pano_Learning_to_ICCV_2025_supplemental.pdf]

## A. Qualitative Results on Ablation Study

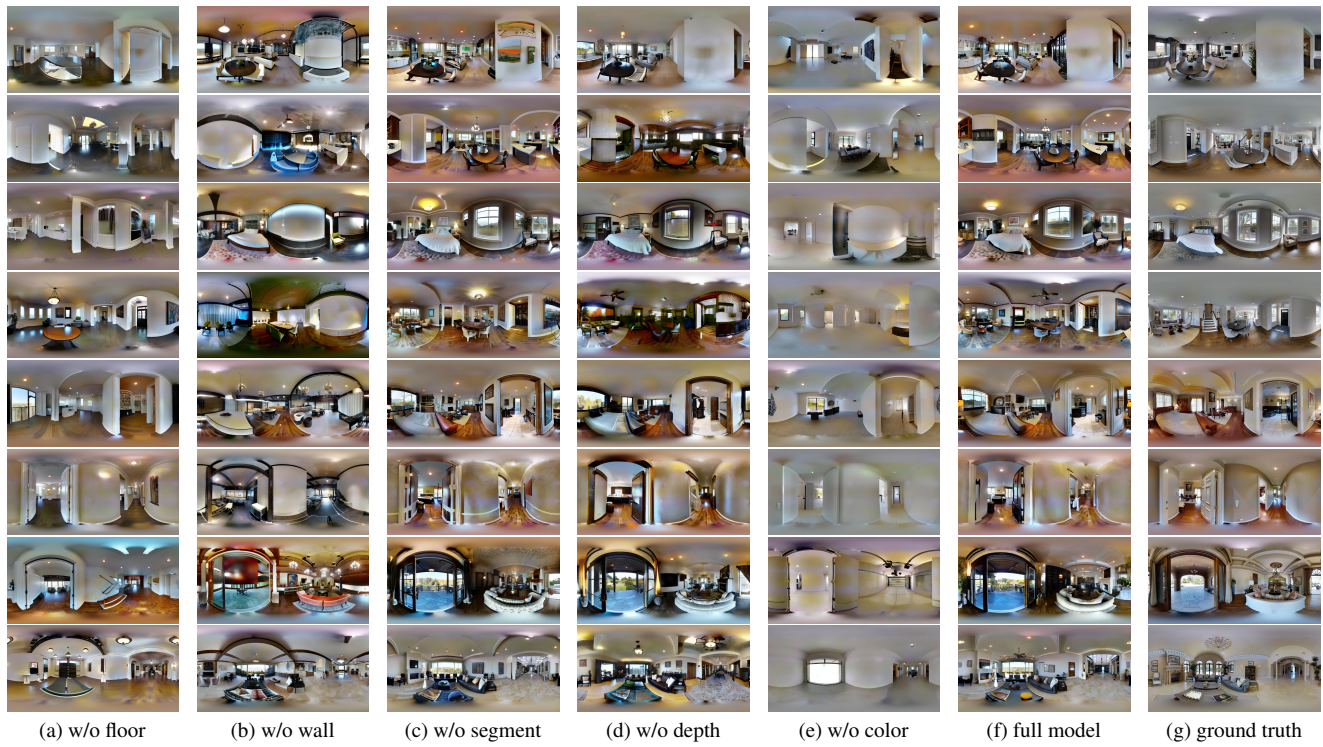

Figure A.1. Qualitative results of ablation experiments on the Matterport3D dataset.

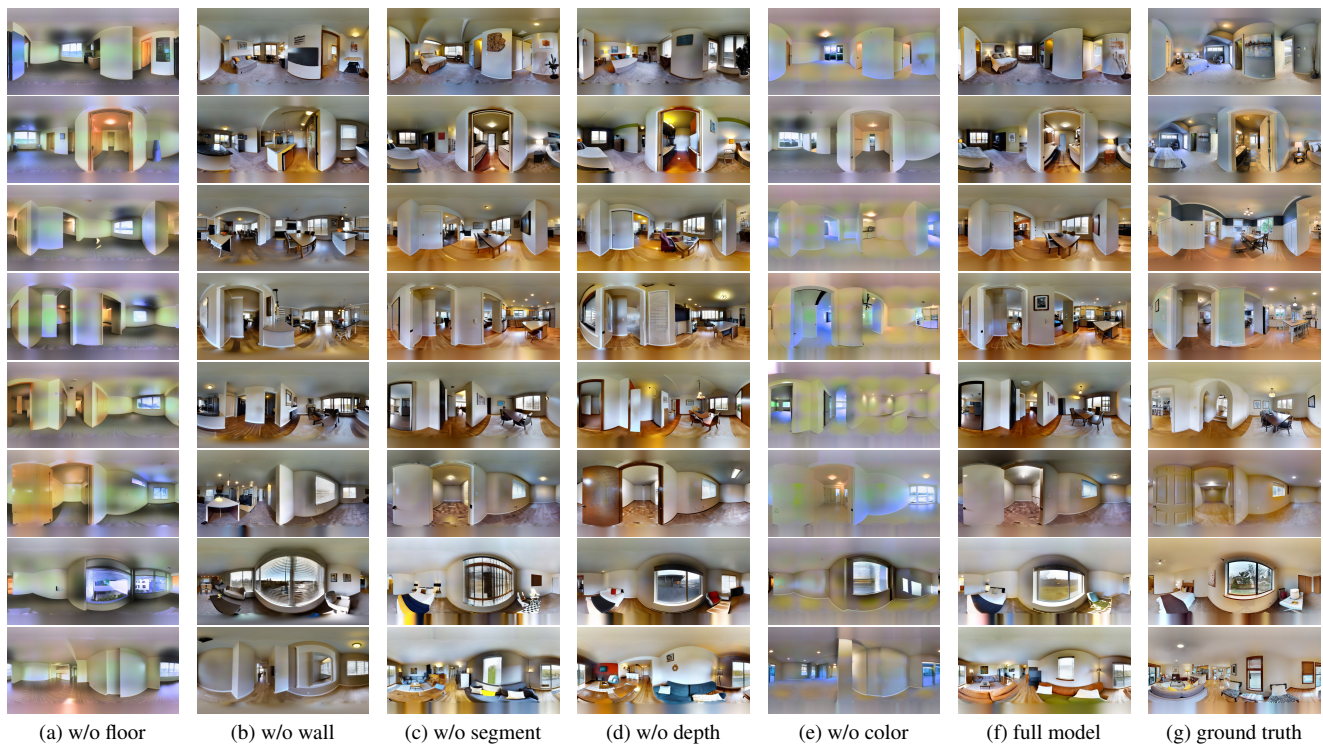

Figure A.2. Qualitative results of ablation experiments on the Gibson dataset.
